# Supplementary material for: An atlas of genetic associations in UK Biobank
Source: Springer Nature journal article supplement (doi:10.1038/s41588-018-0248-z), 2018-10-19
Supplement: 41588_2018_248_MOESM2_ESM.pdf [file 41588_2018_248_MOESM2_ESM.pdf]

## Life Sciences Reporting Summary

Nature Research wishes to improve the reproducibility of the work that we publish. This form is intended for publication with all accepted life science papers and provides structure for consistency and transparency in reporting. Every life science submission will use this form; some list items might not apply to an individual manuscript, but all fields must be completed for clarity.

For further information on the points included in this form, see [Reporting Life Sciences Research](#). For further information on Nature Research policies, including our [data availability policy](#), see [Authors & Referees](#) and the [Editorial Policy Checklist](#).

### ► Experimental design

#### 1. Sample size

Describe how sample size was determined.

Our study is an analysis of the UK Biobank available data. We did not determine the sample size.

#### 2. Data exclusions

Describe any data exclusions.

We excluded individuals who were identified by the UK Biobank as outliers based on either genotyping missingness rate or heterogeneity, whose sex inferred from the genotypes did not match their self-reported sex and who were not of white ancestry (based on both, self-reported ethnicity and those from whom one of the two first genomic principal components did not fall within 5 standard deviations from the mean). Finally, we removed individuals with a missingness >5% across variants which passed our quality control procedure and those that have a missing phenotype for 40 or more traits. The resulting study cohort comprised 452,264 individuals. The exclusion criteria was pre-established before performing the analyses following best GWAS practices.

#### 3. Replication

Describe whether the experimental findings were reliably reproduced.

Experimental replication was not attempted.

#### 4. Randomization

Describe how samples/organisms/participants were allocated into experimental groups.

Not relevant because our study was not experimental.

#### 5. Blinding

Describe whether the investigators were blinded to group allocation during data collection and/or analysis.

The authors of this manuscript did not participate in the recruitment. The data collection, as described from UK Biobank:  
Recruitment were via centrally coordinated identification and invitation from population-based registers (such as those held by the NHS) of potentially eligible people living within a reasonable travelling distance of an assessment centre (located around the UK). This central recruitment strategy will allow invitations to be targeted to enhance generalisability and to make allowance for the impact on participation rates of various factors (e.g. age, sex, ethnicity, socioeconomic status). Each assessment centre will aim to recruit as many as possible of the nearby target population during a period of about six months to one year (depending on the local population density and transport links), and will then be relocated in order to achieve recruitment across most of the UK.

Note: all studies involving animals and/or human research participants must disclose whether blinding and randomization were used.

## 6. Statistical parameters

For all figures and tables that use statistical methods, confirm that the following items are present in relevant figure legends (or in the Methods section if additional space is needed).

n/a Confirmed

- The exact sample size ( $n$ ) for each experimental group/condition, given as a discrete number and unit of measurement (animals, litters, cultures, etc.)
- A description of how samples were collected, noting whether measurements were taken from distinct samples or whether the same sample was measured repeatedly
- A statement indicating how many times each experiment was replicated
- The statistical test(s) used and whether they are one- or two-sided (note: only common tests should be described solely by name; more complex techniques should be described in the Methods section)
- A description of any assumptions or corrections, such as an adjustment for multiple comparisons
- The test results (e.g.  $P$  values) given as exact values whenever possible and with confidence intervals noted
- A clear description of statistics including central tendency (e.g. median, mean) and variation (e.g. standard deviation, interquartile range)
- Clearly defined error bars

See the web collection on [statistics for biologists](#) for further resources and guidance.

## ► Software

Policy information about [availability of computer code](#)

## 7. Software

Describe the software used to analyze the data in this study.

We used DISSECT (v1.15.2c, May 24, 2018) for the main analyses, which is publicly available at <http://www.dissect.ed.ac.uk/> under GNU Lesser General Public License v3. We also used PLINK (v1.9 and v2.0, freely available online) and BGENIX (v1.0) freely available online (<https://bitbucket.org/gavinband/bgen>) for preparing the data.

For manuscripts utilizing custom algorithms or software that are central to the paper but not yet described in the published literature, software must be made available to editors and reviewers upon request. We strongly encourage code deposition in a community repository (e.g. GitHub). *Nature Methods* [guidance for providing algorithms and software for publication](#) provides further information on this topic.

## ► Materials and reagents

Policy information about [availability of materials](#)

## 8. Materials availability

Indicate whether there are restrictions on availability of unique materials or if these materials are only available for distribution by a for-profit company.

No unique materials were used in the study.

## 9. Antibodies

Describe the antibodies used and how they were validated for use in the system under study (i.e. assay and species).

No antibodies were used in the study.

## 10. Eukaryotic cell lines

a. State the source of each eukaryotic cell line used.

No eukaryotic cell lines were used in the study.

b. Describe the method of cell line authentication used.

No eukaryotic cell lines were used in the study.

c. Report whether the cell lines were tested for mycoplasma contamination.

No eukaryotic cell lines were used in the study.

d. If any of the cell lines used are listed in the database of commonly misidentified cell lines maintained by [ICLAC](#), provide a scientific rationale for their use.

No eukaryotic cell lines were used in the study.

## ► Animals and human research participants

---

Policy information about [studies involving animals](#); when reporting animal research, follow the [ARRIVE guidelines](#)

### 11. Description of research animals

Provide details on animals and/or animal-derived materials used in the study.

No animals were used in this study.

Policy information about [studies involving human research participants](#)

### 12. Description of human research participants

Describe the covariate-relevant population characteristics of the human research participants.

UK Biobank recruited ~500,000 people aged between 40-69 years in 2006-2010 from across the country to take part in this project. In our analysis we included the individuals of white ancestry, which were not genetic outliers, that passed the quality control tests.
